# Supplementary figures and images for: The pharmacokinetics of oral trazpiroben (TAK‐906) after organic anion transporting polypeptide 1B1/1B3 inhibition: A phase I, randomized study
Source: PubMed Central journal article supplement — Clin Transl Sci. 2022 May 5;15(6):1532–43. doi: 10.1111/cts.13274 (PMC9199876; doi:10.1111/cts.13274), 2022-05-05

**Figure S3** Mean plasma concentration–time curves of coproporphyrin (CP) I (a) and CP III (b)

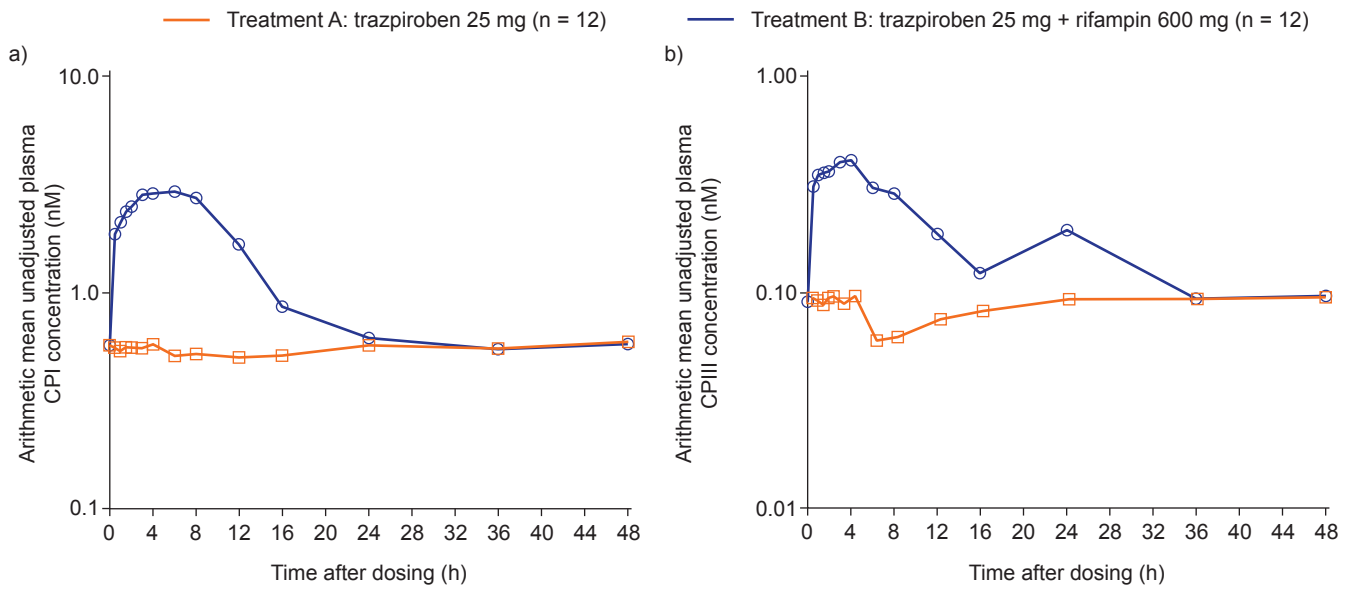

Supplement: CTS-15-1532-s001.pdf [file CTS-15-1532-s001.pdf]

**Figure S1** Mean (+ SD) plasma concentration–time curves of trazpiroben

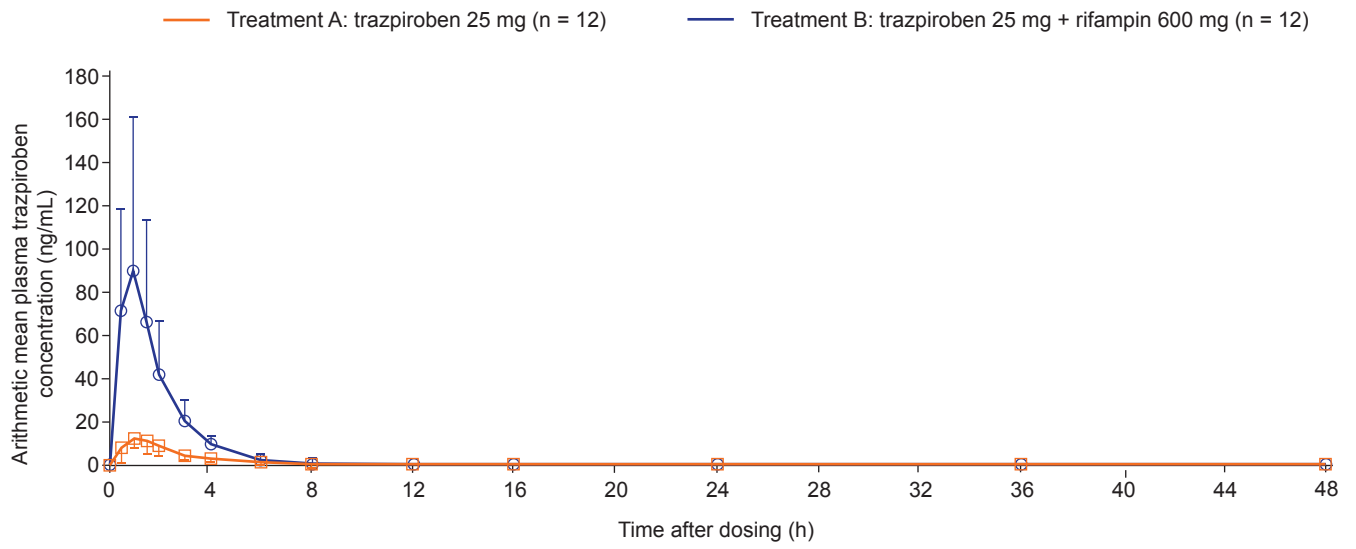

SD, standard deviation.

Supplement: CTS-15-1532-s004.pdf [file CTS-15-1532-s004.pdf]

**Figure S2** Median plasma concentration–time curves of M23 on a linear scale (a) and semi-log scale (b)

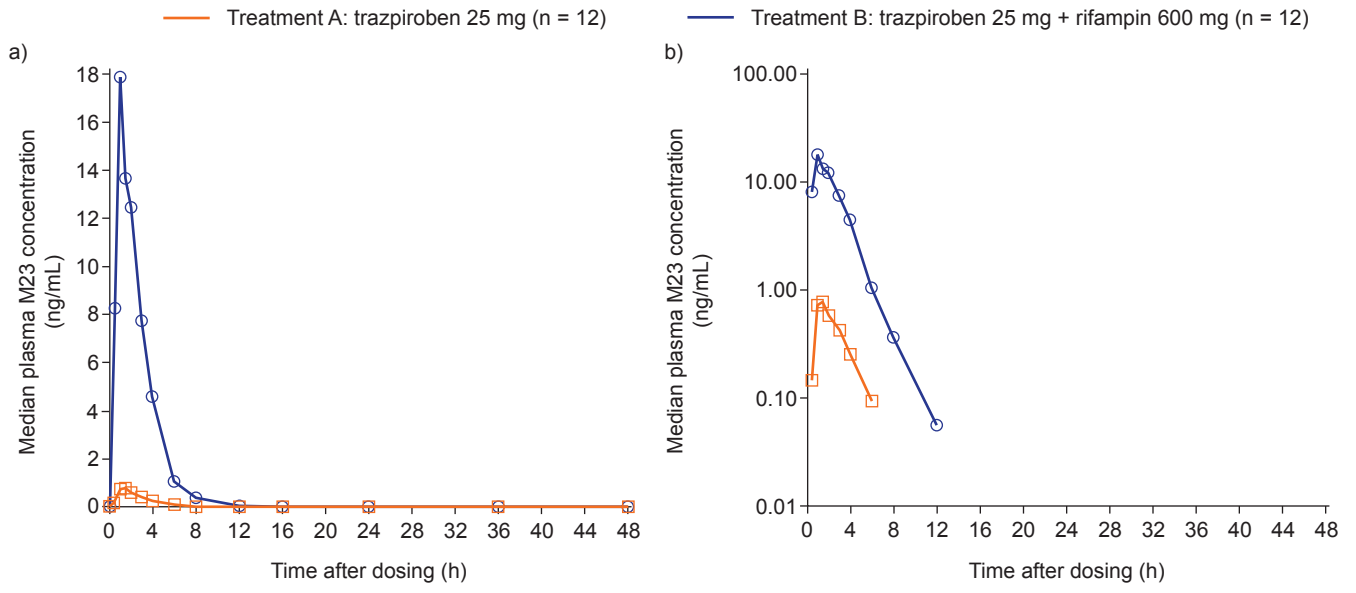

Supplement: CTS-15-1532-s006.pdf [file CTS-15-1532-s006.pdf]
